# Supplementary material for: Characterization of Rhizosphere Microbial Diversity and Selection of Plant-Growth-Promoting Bacteria at the Flowering and Fruiting Stages of Rapeseed
Source: MDPI journal article supplement (doi:10.3390/plants13020329), 2024-01-22
Supplement: s1 [file s1]

Supplementary Figure S1

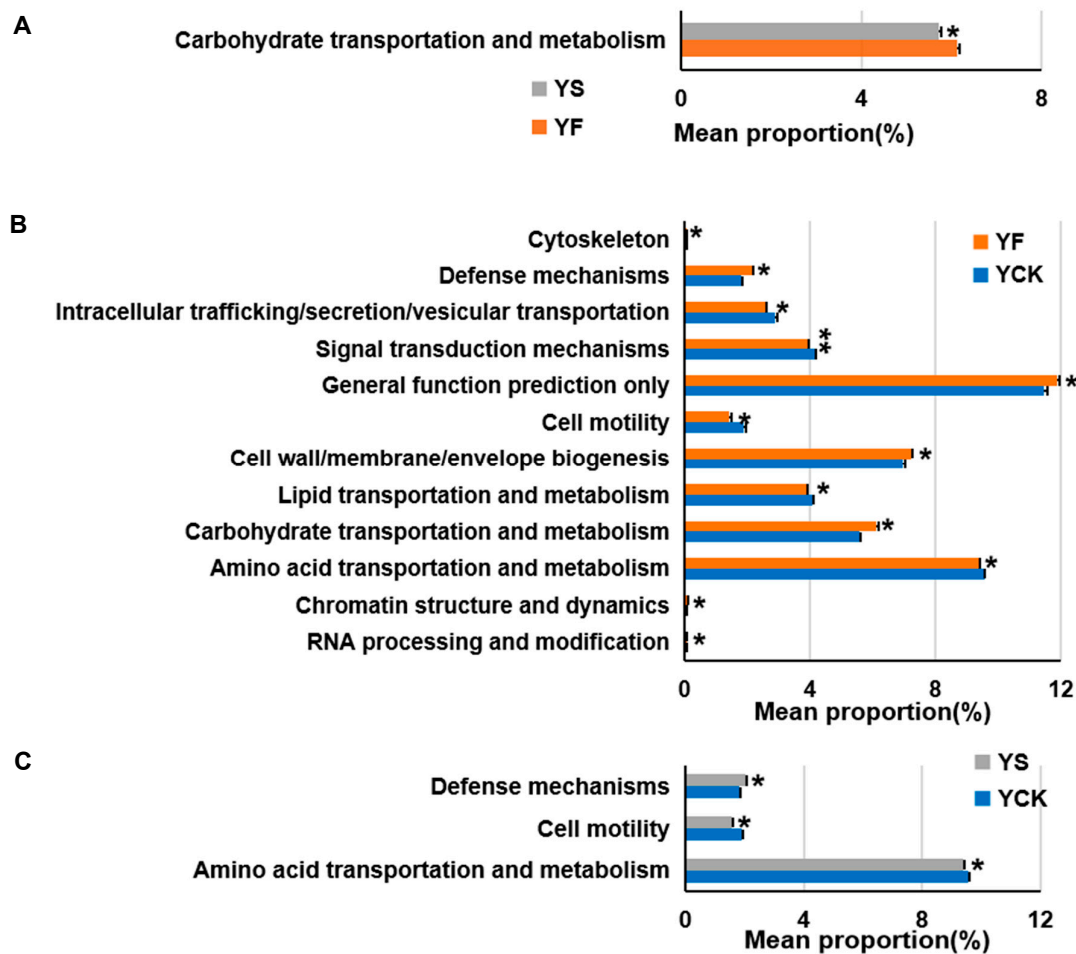

Supplementary Figure S1. The difference in the COG functional prediction between the YF, YS and YCK groups. (A) the difference in the COG abundance prediction between the YF and YS groups, (B) the difference in the COG abundance prediction between the YF and YCK groups, (C) the difference in the COG abundance prediction between the YS and YCK groups. \* $p < 0.05$ ; \*\* $p < 0.01$

Supplementary Table S1: Classifications of identified plant growth promoting rhizobacteria in different soil samples

| Strain | Silicate bacteria<br>mediums | SLP medium                         |                                        |                                      |
|--------|------------------------------|------------------------------------|----------------------------------------|--------------------------------------|
|        |                              | Supplemented<br>with 10 mg/L of Cu | Supplemented<br>with 700 mg/L of<br>Zn | Supplemented with<br>4000 mg/L of Pb |
| YF3    | +                            | -                                  | -                                      | -                                    |
| YF4    | -                            | -                                  | -                                      | +                                    |
| YF6    | -                            | -                                  | +                                      | +                                    |
| YF7    | -                            | +                                  | +                                      | -                                    |
| YF12   | -                            | -                                  | -                                      | -                                    |
| YF13   | +                            | +                                  | -                                      | -                                    |
| YF15   | +                            | -                                  | -                                      | +                                    |
| YF16   | -                            | -                                  | +                                      | -                                    |
| YF20   | +                            | +                                  | -                                      | -                                    |
| YF21   | +                            | +                                  | +                                      | +                                    |
| YF25   | -                            | -                                  | -                                      | -                                    |
| YF26   | +                            | -                                  | -                                      | -                                    |
| YF28   | -                            | -                                  | -                                      | -                                    |
| YF29   | +                            | -                                  | -                                      | -                                    |
| YF30   | -                            | +                                  | -                                      | +                                    |
| YF32   | +                            | +                                  | -                                      | +                                    |
| YF33   | -                            | +                                  | -                                      | +                                    |
| YF35   | -                            | -                                  | +                                      | -                                    |
| YF43   | +                            | +                                  | +                                      | -                                    |
| YF45   | -                            | -                                  | -                                      | -                                    |
| YF51   | -                            | -                                  | -                                      | +                                    |
| YF52   | -                            | -                                  | -                                      | -                                    |
| YF53   | +                            | -                                  | +                                      | +                                    |
| YF57   | -                            | -                                  | -                                      | +                                    |
| YF58   | +                            | +                                  | -                                      | -                                    |
| YF60   | -                            | -                                  | -                                      | -                                    |
| YF61   | -                            | -                                  | -                                      | +                                    |
| YF63   | +                            | +                                  | -                                      | +                                    |
| YF64   | +                            | -                                  | -                                      | -                                    |
| YF66   | -                            | -                                  | -                                      | +                                    |
| YF67   | -                            | -                                  | -                                      | +                                    |
| YF70   | -                            | -                                  | +                                      | -                                    |
| YF71   | -                            | +                                  | -                                      | -                                    |
| YF72   | +                            | +                                  | -                                      | +                                    |
| YS1    | +                            | +                                  | -                                      | -                                    |
| YS2    | +                            | -                                  | -                                      | -                                    |
| YS3    | -                            | +                                  | -                                      | +                                    |
| YS12   | -                            | -                                  | +                                      | -                                    |
| YS13   | -                            | +                                  | -                                      | +                                    |
| YS19   | -                            | -                                  | -                                      | -                                    |
| YS20   | -                            | -                                  | -                                      | +                                    |
| YS22   | -                            | -                                  | -                                      | -                                    |
| YS23   | +                            | +                                  | +                                      | -                                    |
| YS24   | -                            | -                                  | -                                      | -                                    |
| YS28   | -                            | -                                  | -                                      | -                                    |

---

|      |   |   |   |   |
|------|---|---|---|---|
| YS30 | - | + | - | + |
| YS31 | + | + | - | - |
| YS32 | - | - | - | + |
| YS34 | - | - | + | + |
| YS36 | - | + | - | - |
| YS38 | - | - | + | - |
| YS43 | - | - | - | + |
| YS44 | - | - | + | + |
| YS45 | - | - | - | - |
| YS46 | - | - | + | + |
| YS53 | - | - | - | + |
| YS54 | - | - | - | - |
| YS55 | - | - | - | - |
| YS61 | - | + | + | + |
| YS62 | - | - | - | - |
| YS64 | - | - | - | + |
| YS65 | - | + | + | + |
| YS66 | - | - | - | - |
| YS67 | - | - | - | - |
| YS70 | - | - | + | + |

---

Supplementary Table S2: The rhizosphere soil microbial community in flowering and fruiting stages of rapeseed were significantly different from the control group

| Relative abundance of microbial community |                   |               |                 |                 |                   |                |              |
|-------------------------------------------|-------------------|---------------|-----------------|-----------------|-------------------|----------------|--------------|
| Bacterial phyla                           | Proteobacteria    | Bacteroidetes | Chloroflexi     | Patescibacteria | Planctomycetes    | Nitrospirae    | Rokubacteria |
| YCK                                       | 47.99%±3.33%a     | 9.43%±4.40%a  | 4.01%±2.33%a    | 2.10%±1.02%a    | 3.02%±0.70%a      | 1.68%±0.39%a   | 5.22%±1.78%  |
| YF                                        | 24.04%±1.83%b     | 19.34%±3.81%b | 12.71%±0.81%b   | 9.20%±1.47%b    | 4.87%±0.01%b      | 1.92%±0.80%a   | -            |
| YS                                        | 30.03%±3.36%c     | 17.36%±2.53%c | 8.82%±1.02%c    | 3.42%±1.19%a    | 2.55%±0.84%a      | 3.08%±0.26%b   | -            |
| Bacterial genera                          | Ellin6067         | Sphingomonas  | Flavisolibacter | UTCFX1          | ADurb.Bin063-1    |                |              |
| YCK                                       | 5.35%±1.76%a      | 1.02%±0.43%a  | -               | -               | -                 |                |              |
| YF                                        | 1.80%±0.52%b      | 2.90%±1.38%a  | 5.15%±0.65%a    | 6.20%±0.39%a    | 3.61%±0.35%a      |                |              |
| YS                                        | 1.11%±0.25%c      | 3.54%±1.33%b  | 2.40 %±1.24%a   | 2.68%±0.60%b    | 2.43%±0.26%b      |                |              |
| Fungal phyla                              | Mortierellomycota | Olpidiomycota | Ascomycota      | Basidiomycota   | Rozellomycota     | Glomeromycota  |              |
| YCK                                       | 15.11%±0.68%a     | -             | 31.96%±9.67%a   | 16.47%±4.28%a   | -                 | 10.78%±5.01%   |              |
| YF                                        | 78.61%±8.10%b     | -             | 4.03%±0.84%b    | 3.39%±0.87%b    | 2.70%±1.23%a      | -              |              |
| YS                                        | 21.93%±3.78%c     | 63.29%±1.96%  | 3.64%±2.28%bc   | -               | 6.16%±3.90%a      | -              |              |
| Fungal genera                             | Mortierella       | Rhizophagus   | Olpidium        | Fusarium        | Cystofilobasidium | Ceratobasidium |              |
| YCK                                       | 1.51%±0.07%a      | 1.27%±0.19%   | -               | -               | -                 | 10.27%±2.65%   |              |
| YF                                        | 6.25%±0.16%b      | -             | -               | 3.78%±1.06%     | 2.20%±0.39%       | -              |              |
| YS                                        | 1.66%±0.15%c      | -             | 6.31%±0.16%     | -               | -                 | -              |              |

Note: The '-' means the relative abundance of microbial community was lower than 1%.

The relative abundance was indicated by mean and standard deviation for triplicates. The data with different letter in each column was significantly different ( $P < 0.05$ ).

YF, YS and YCK mean rhizosphere soil samples collected from the roots of flowering stage of rapeseed, the roots of of fruiting stages, and the control check soil samples, respectively.
